# Supplementary material for: Decreased KPNB1 Expression is Induced by PLK1 Inhibition and Leads to Apoptosis in Lung Adenocarcinoma
Source: PubMed Central journal article supplement — J Cancer. 2017 Nov 6;8(19):4125–40. doi: 10.7150/jca.21802 (PMC5706017; doi:10.7150/jca.21802), 2017-11-06

### Supplementary Figure. 1

KPNB1 mRNA expression levels in lung adenocarcinoma cell lines and small airway epithelial cell (SAEC) cell lines (rpkm). Rpkm is the abbreviation for “reads per kilobase per million.”

### Supplementary Figure. 2

The correlation between PLK1 and KPNB1 expression levels of 230 resected lung adenocarcinomas. The data was acquired from the database of The Cancer Genome Atlas (TCGA) (<https://cancergenome.nih.gov/>) and visualized by cBioPortal (<http://www.cbioportal.org/index.do>).

### Supplementary Figure. 3

The number of H1299 cells was counted 24, 48, and 72 hours after the addition of BI2536. Error bars represent standard deviations.

Supplementary figure 1

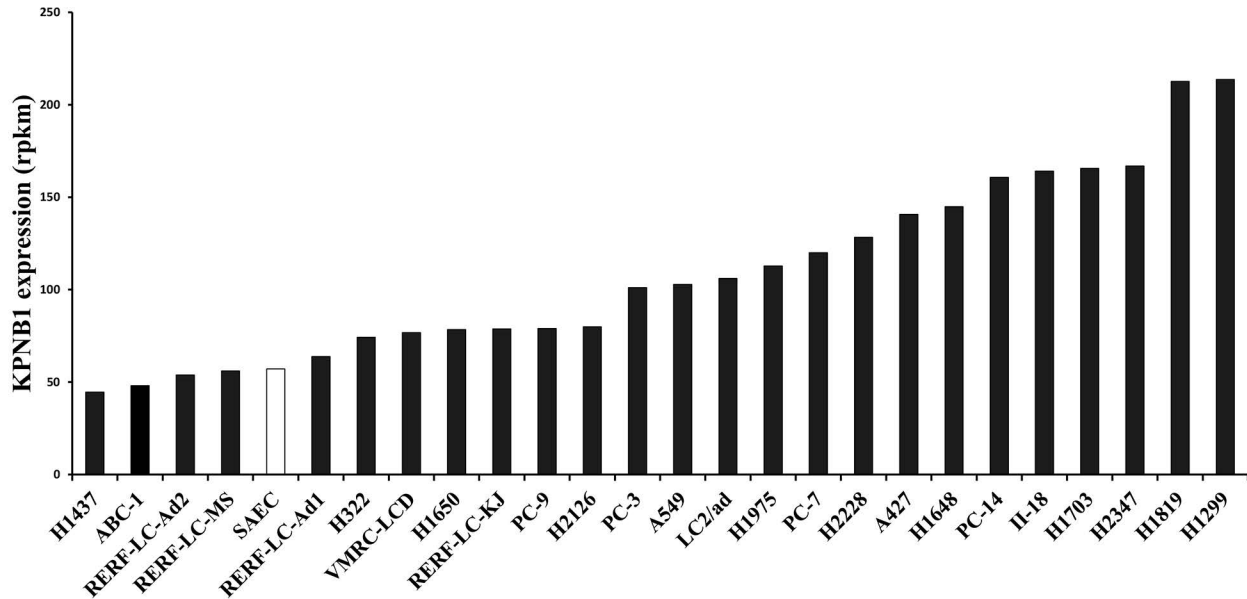

Supplementary figure 2

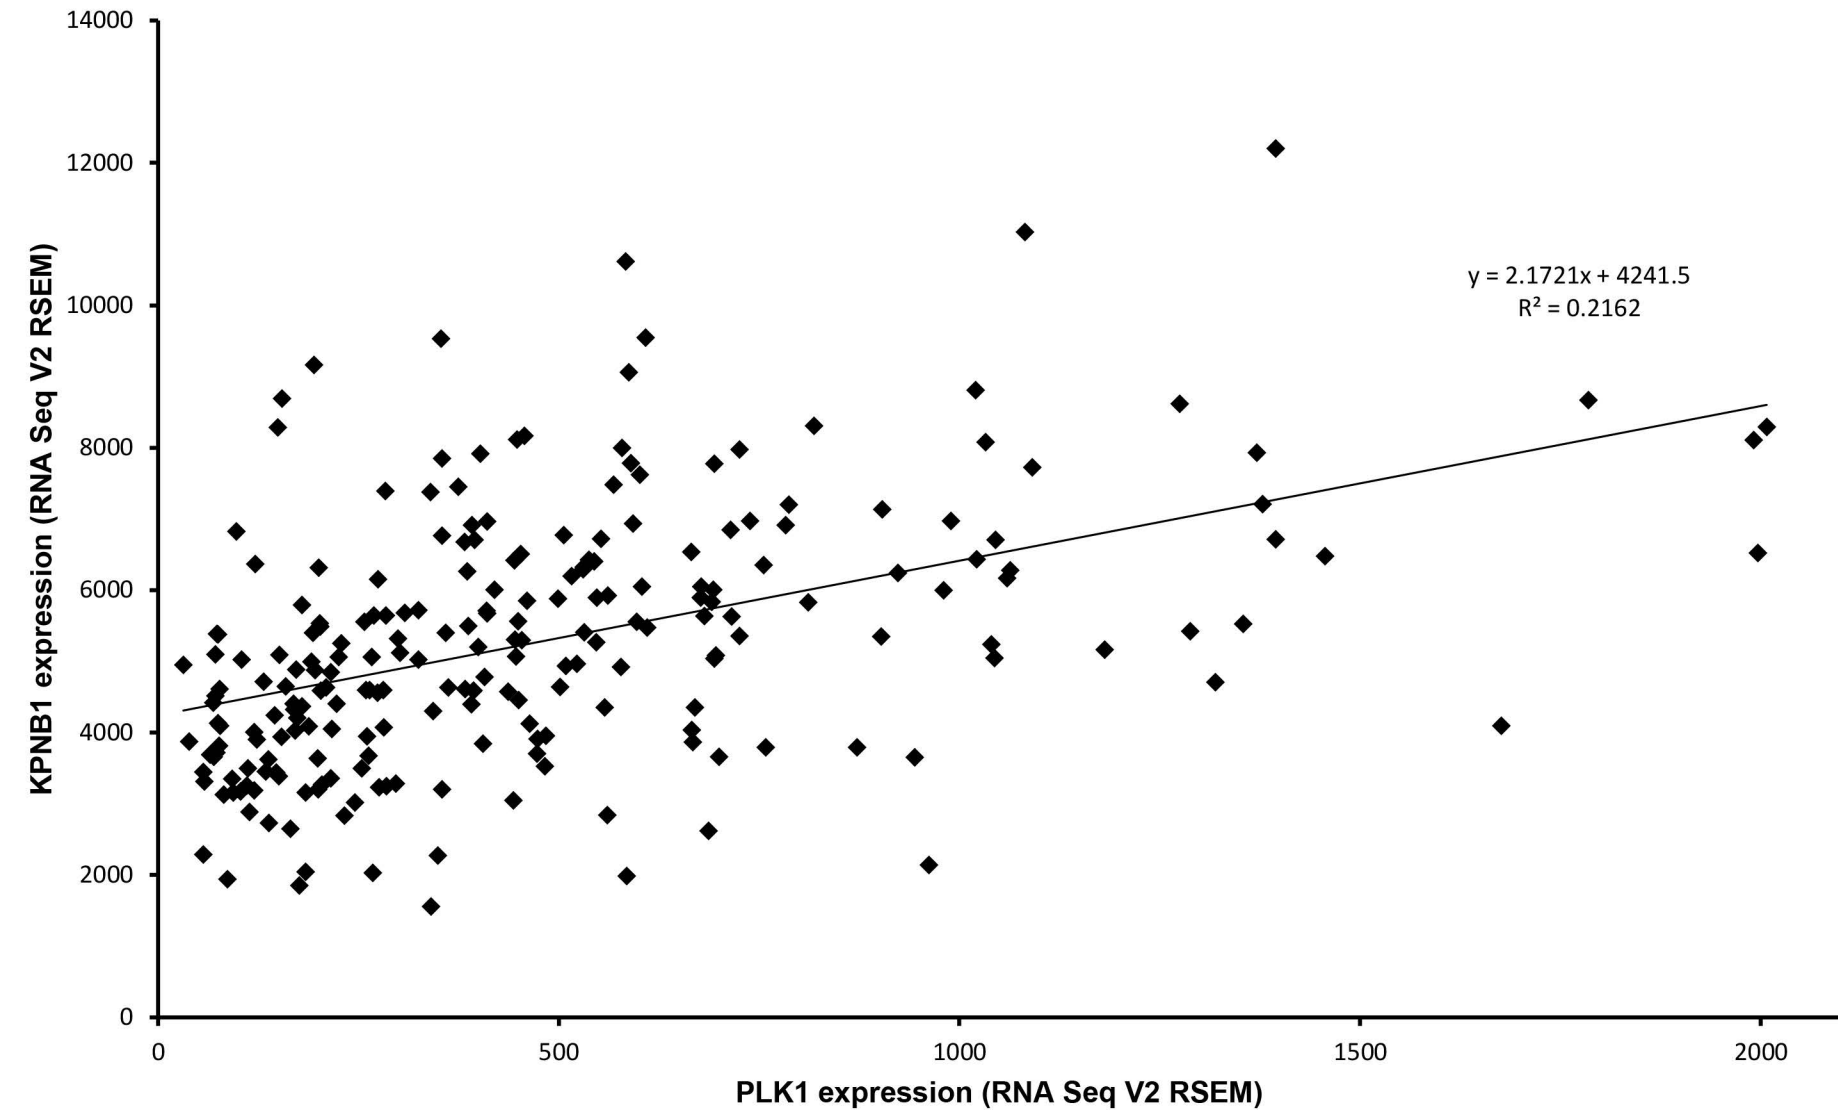

**Supplementary figure 3**

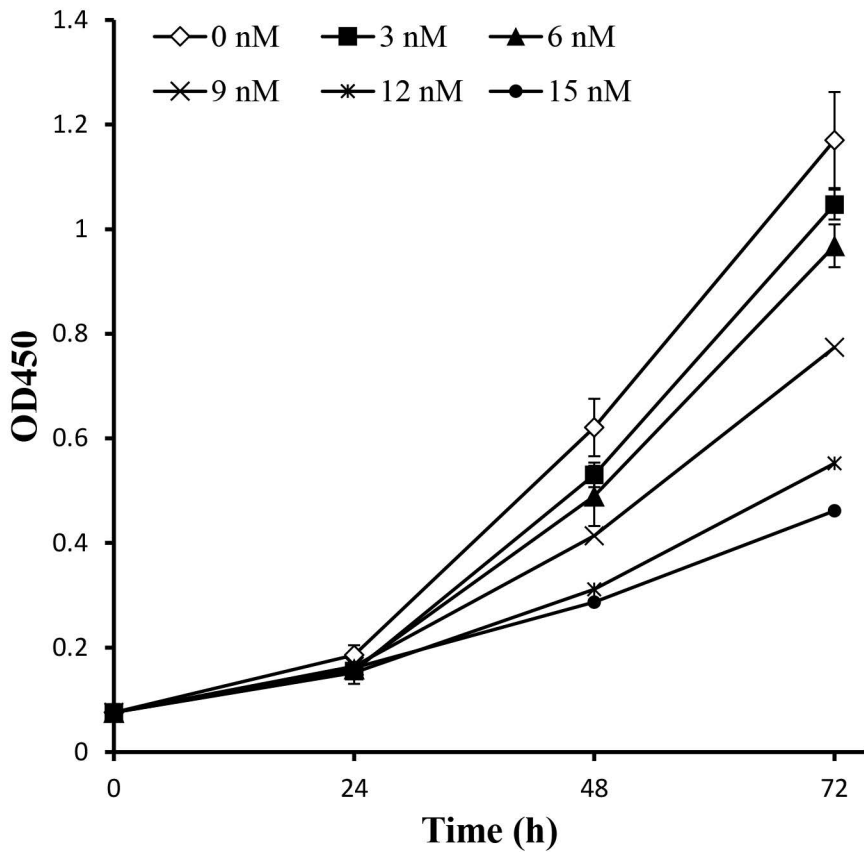

Supplement: jcav08p4125s1.pdf [file jcav08p4125s1.pdf]
